# Supplementary material
Source: HighWire-hosted journal article supplement (https://www.cfp.ca/highwire/filestream/30208/field_highwire_adjunct_files/0/Fig1-5.pdf)

**Figure 1.** Mean (SD) ages from research studies used as evidence for recommendations in the Canadian Diabetes Association 2008 clinical practice guidelines<sup>1</sup>:  $N=1206$ .

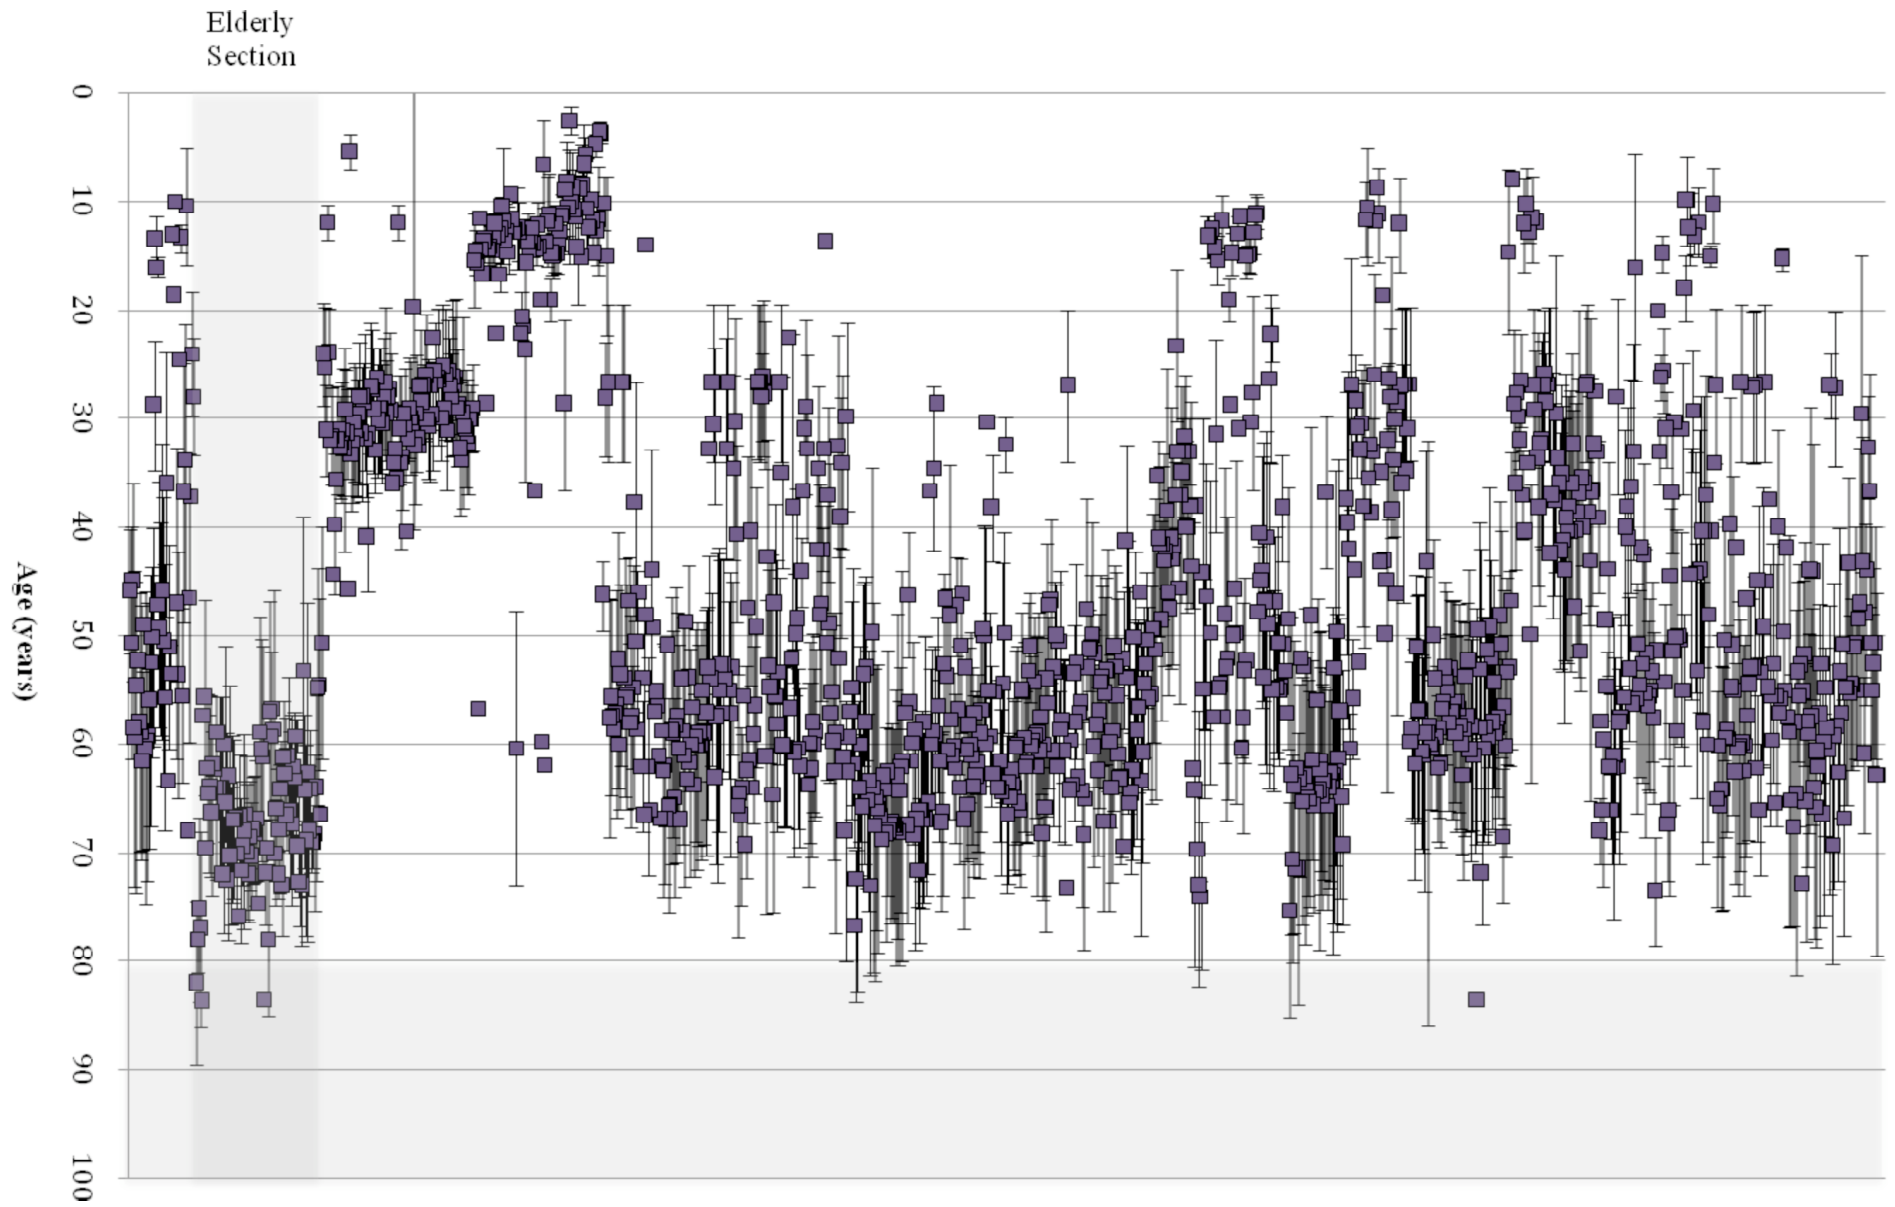

**Figure 2.** Mean (SD) ages from research studies used as evidence for recommendations in the 2009, 2008, 2007, and 2006 Canadian Cardiovascular Society Consensus Conference Guidelines on heart failure<sup>2-5</sup>:  $N=458$ .

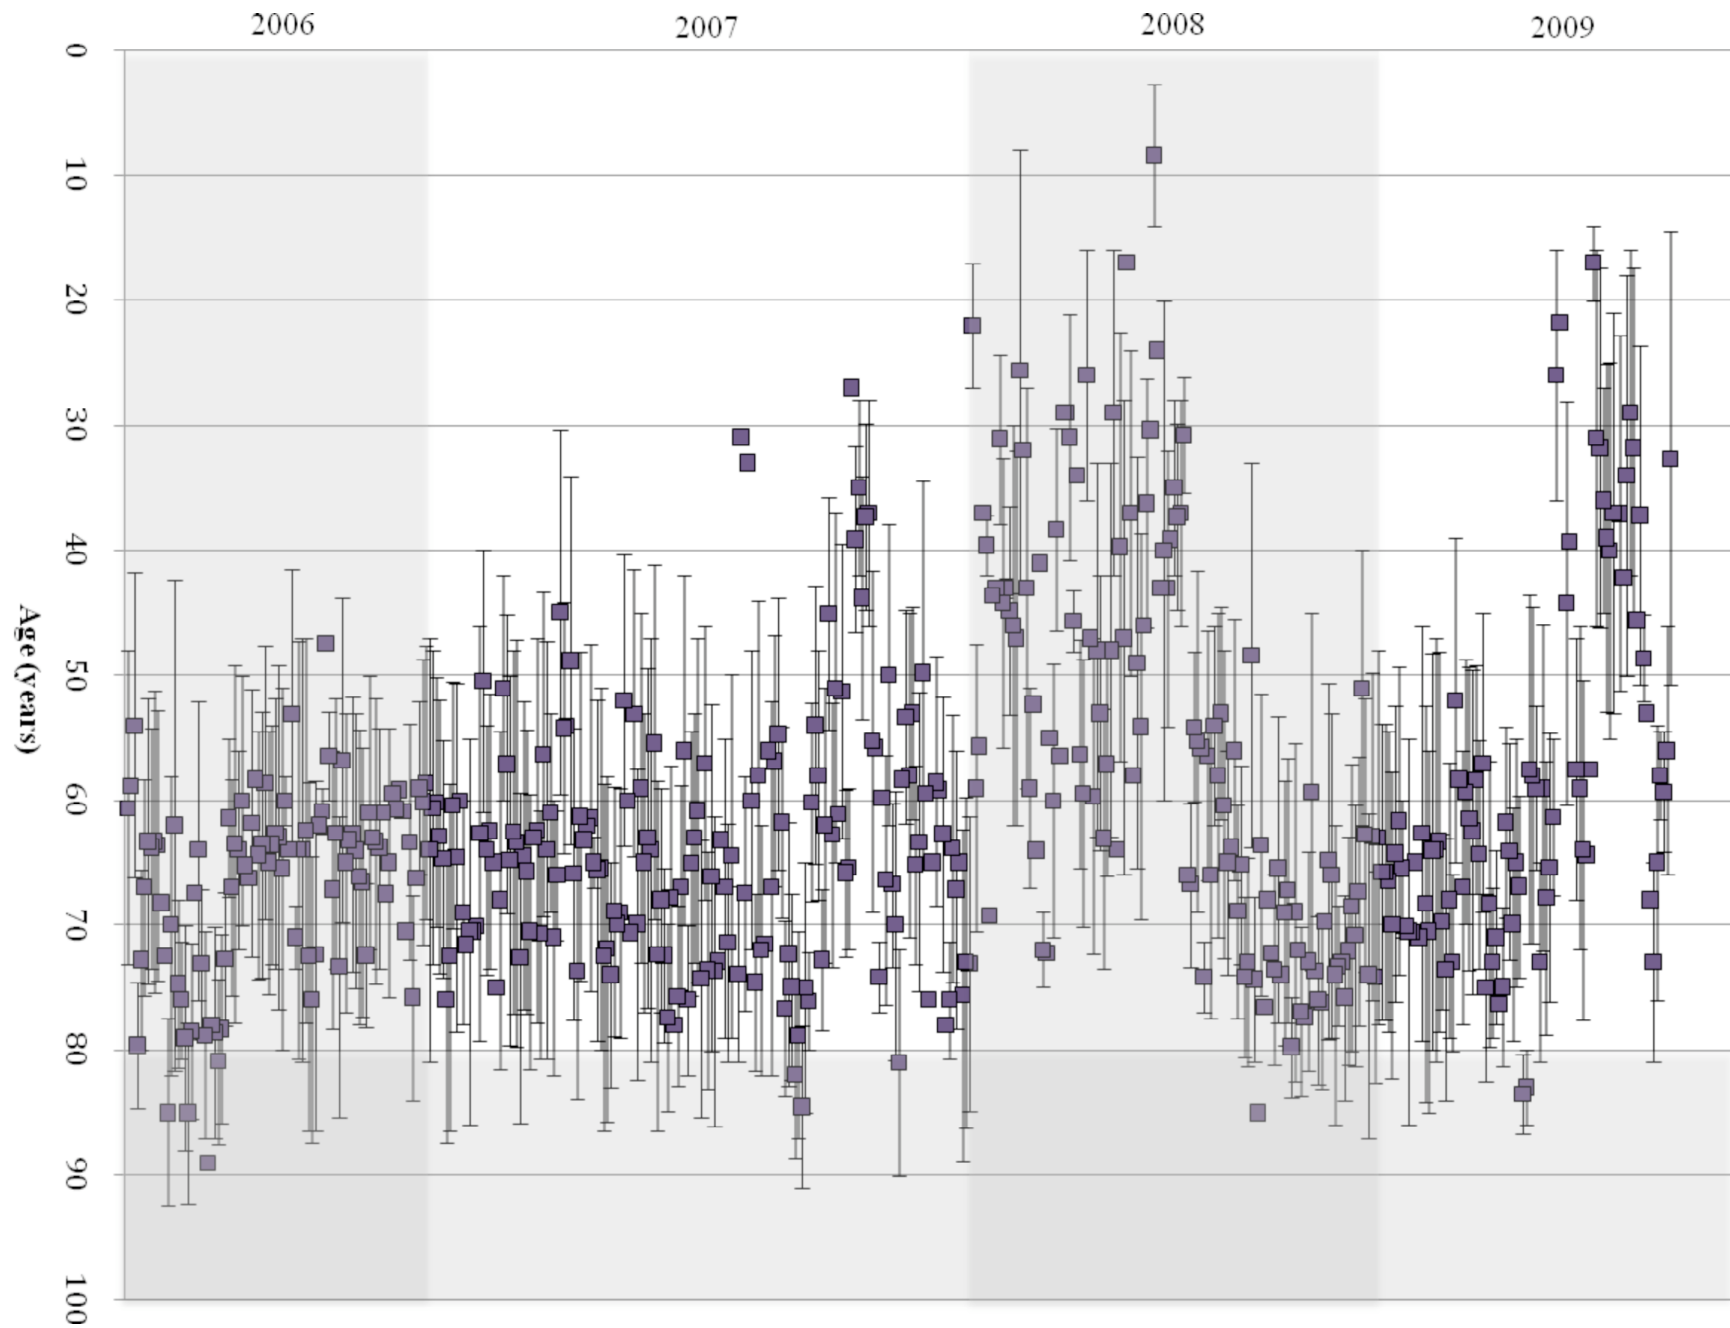

**Figure 3.** Mean (SD) ages from research studies used as evidence for recommendations 2009, 2008, 2007, and 2006 Canadian Hypertension Education Program recommendations for the management of hypertension<sup>6-13</sup>:  $N=136$ .

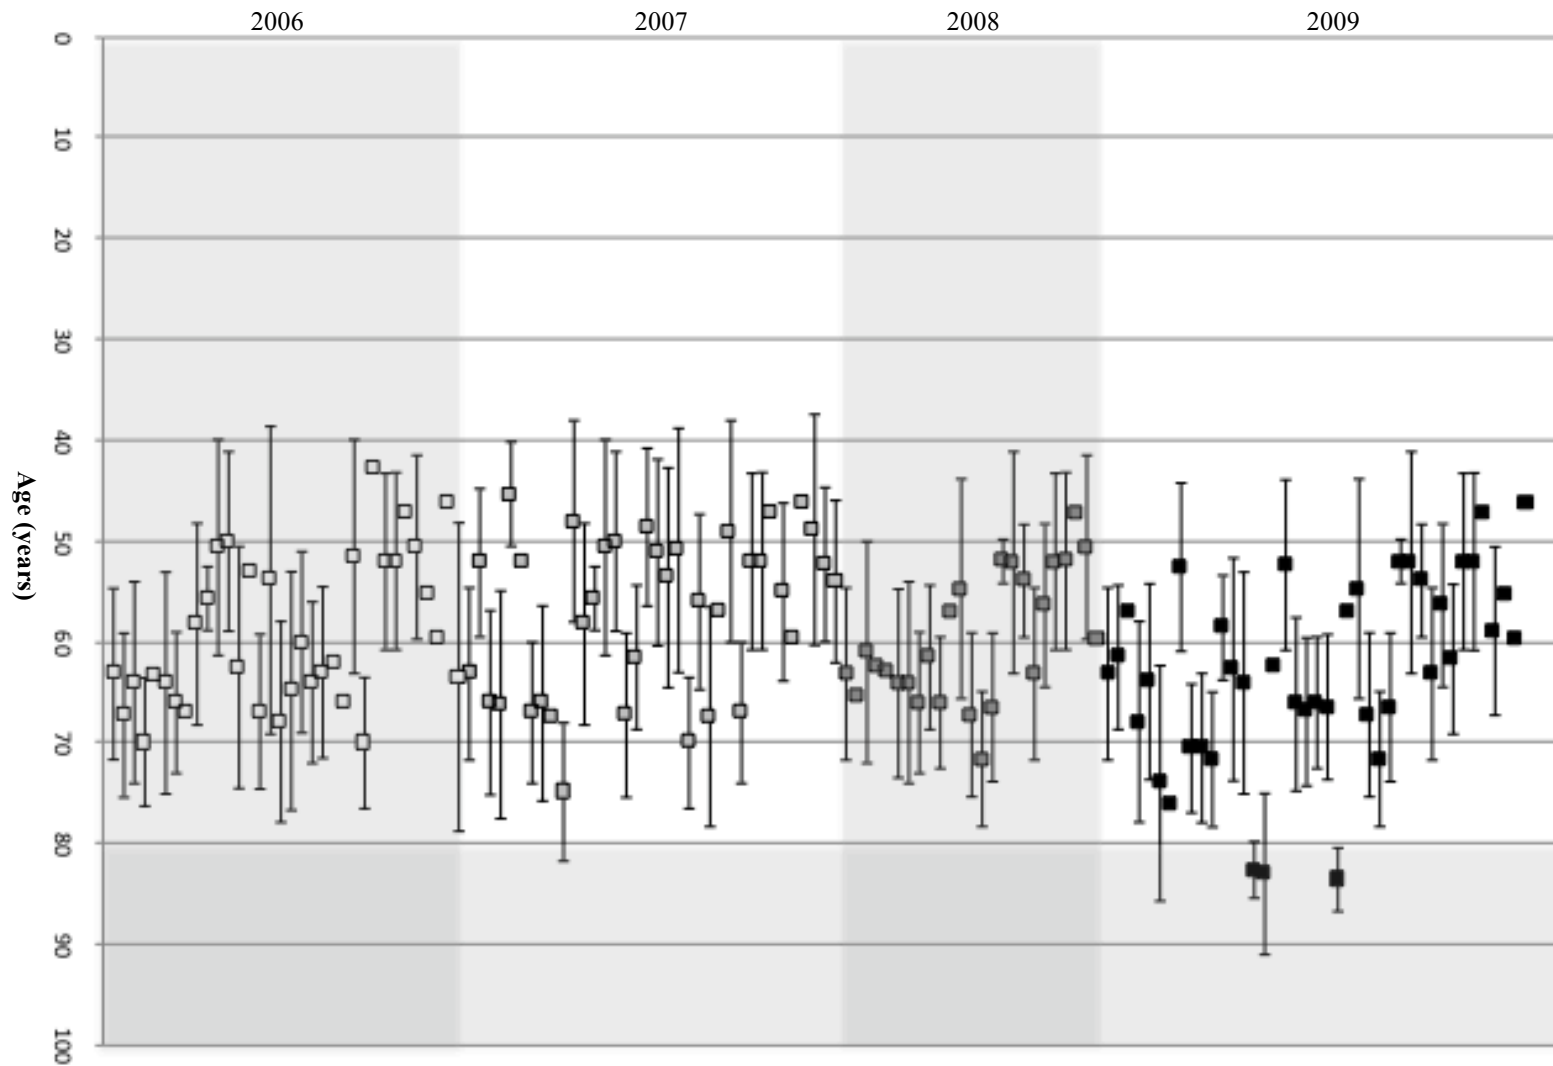

**Figure 4.** Mean (SD) ages from research studies used as evidence for recommendations in the 2002, 2006, and 2010 clinical practice guidelines for the diagnosis and management of osteoporosis care<sup>14-16</sup>;  $N=425$ .

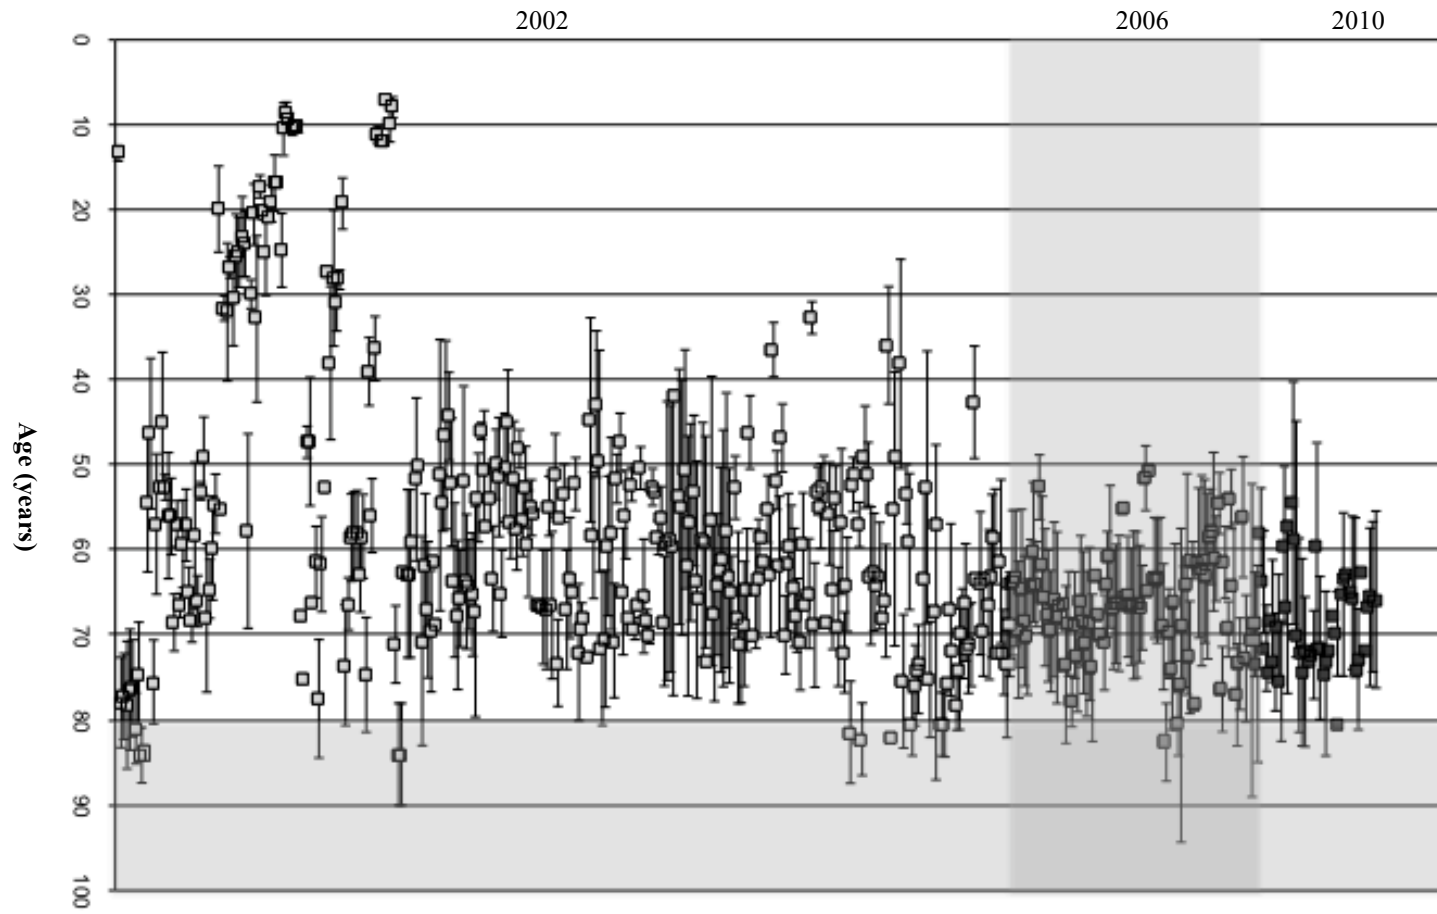

**Figure 5.** Mean (SD) ages from research studies used as evidence for recommendations in the Canadian best practice recommendations for stroke care, 2006 and 2008<sup>17-18</sup>;  $N=47$ .

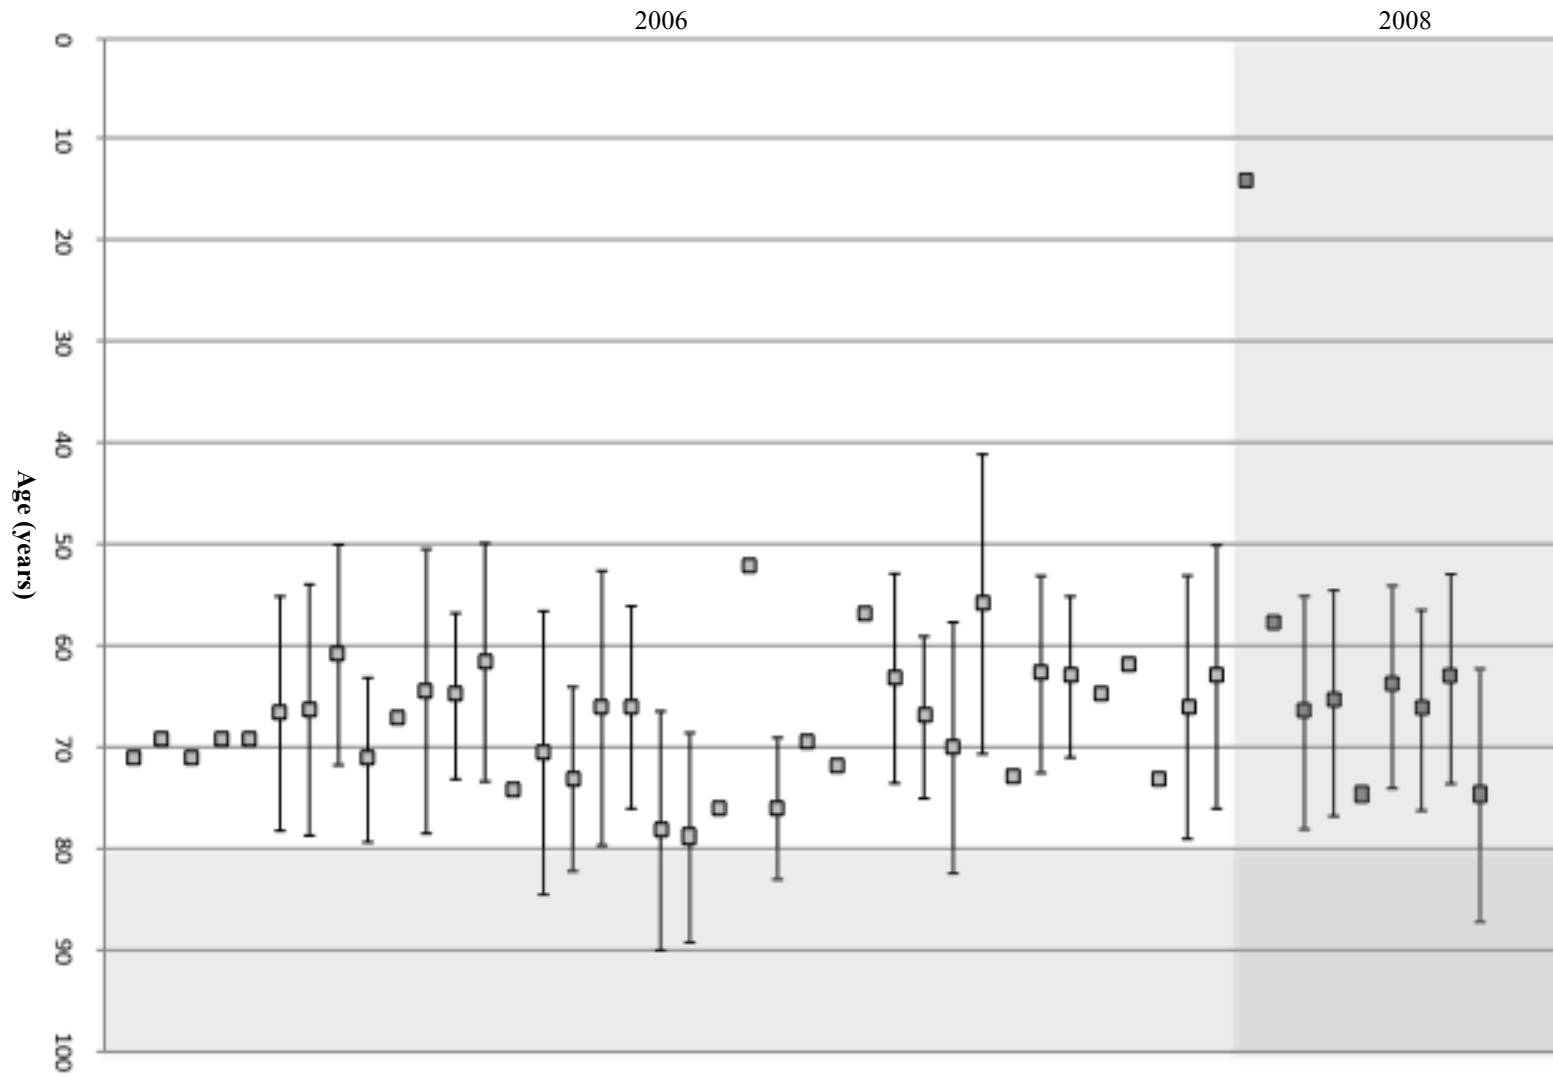

Supplement: Fig1-5.pdf [file Fig1-5.pdf]
